# Supplementary material for: Myc-induced nuclear antigen constrains a latent intestinal epithelial cell-intrinsic anthelmintic pathway
Source: PLOS journal article supplement (doi:10.1371/journal.pone.0211244), 2019-02-26
Supplement: S2 (10.1371/journal.pone.0211244.s002) [file journal.pone.0211244.s002]

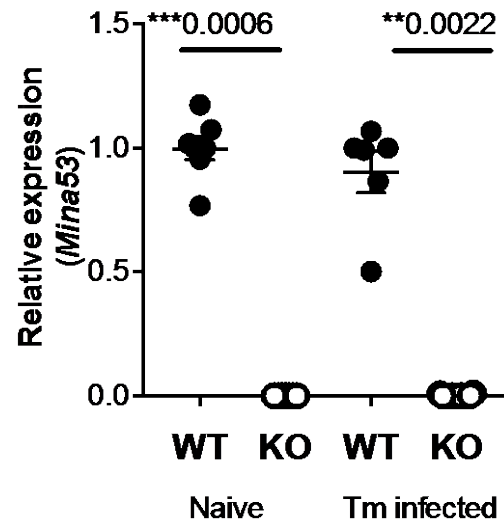

**Fig S2. Expression level of Mina in cecum tissue.** Gene expression of Mina was assessed in uninfected or infected Mina WT or KO by qRT\_PCR using specific primers and probes. Uninfected WT and KO , n=7., Infected WT and KO n=6 respectively. Statistical significance was computed using the Mann-Whitney test.
