# Supplementary material for: Myc-induced nuclear antigen constrains a latent intestinal epithelial cell-intrinsic anthelmintic pathway
Source: PLOS journal article supplement (doi:10.1371/journal.pone.0211244), 2019-02-26
Supplement: S3 (10.1371/journal.pone.0211244.s003) [file journal.pone.0211244.s003]

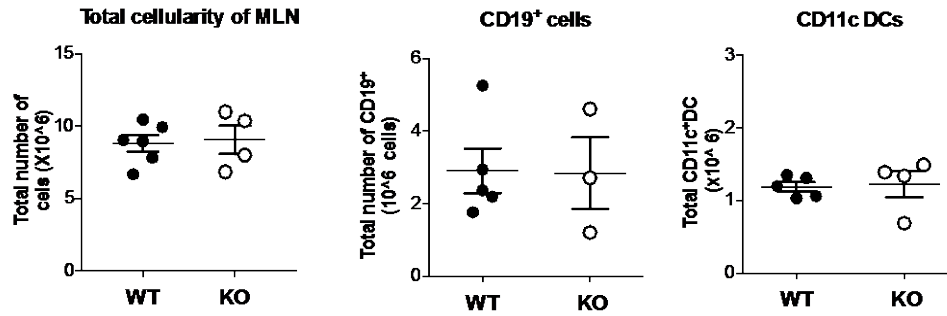

**Fig S3. Cellularity of TM infected Mina WT and KO.** The total cellularity, total number of CD19<sup>+</sup> and CD11c<sup>+</sup>DC from MLN of TM infected Mina WT and KO were assessed by flow cytometry and plotted. Statistical analysis was carried out by Mann-Whitney test. (WT and KO, n=5 each for total cellularity and CD11c<sup>+</sup> DC and for CD19<sup>+</sup> cells WT n=5; KO n=3).
