# Supplementary material for: Myc-induced nuclear antigen constrains a latent intestinal epithelial cell-intrinsic anthelmintic pathway
Source: PLOS journal article supplement (doi:10.1371/journal.pone.0211244), 2019-02-26
Supplement: S4 (10.1371/journal.pone.0211244.s004) [file journal.pone.0211244.s004]

**D**

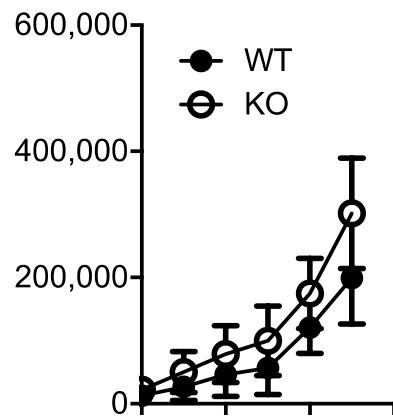

**Fig S4. Proliferation of Mina KO T and B cells.**  $CD4^+CD25^-CD45RB^{hi}$  T cells (A and B) and  $CD19^+$  B cells (C and D) isolated from combined lymph node and spleen of Mina KO or WT littermate control mice were stimulated, respectively, with plate-bound anti-CD3/soluble anti-CD28, CD3/CD28 Dynabeads for A and B, LPS and anti-IgM for C and D respectively. Data are mean  $\pm$  SEM (n = 6 mice). Log(mitogen concentration) versus cpm curves were fitted using a 4 parameter logistic curve model and EC50s of fitted curves were compared to determine statistical significance.
